# Supplementary material
Source: ML conference proceedings conference paper supplement (https://proceedings.neurips.cc/paper_files/paper/2023/hash/5d56e69c317429945785ede86c00b44e-Abstract.html)
Supplement: Supplementary file 1 [file 5d56e69c317429945785ede86c00b44e-Supplemental-Conference.pdf]

---

# RevColV2: Exploring Disentangled Representations in Masked Image Modeling

## Supplementary Material

---

Anonymous Author(s)

Affiliation

Address

email

### 1 More Training Details

This section gives more training details on MIM pre-training and fine-tuning on downstream tasks, such as ImageNet classification, COCO detection, and ADE20K segmentation. For ImageNet experiments, the base learning rate is based on batch size 256.

#### 1.1 Training Details on MIM pre-training.

We use the same setting for different sizes RevCol models on MIM pre-training. The detail hyper-parameters are shown in Table 1. Following exists works [1, 2], we do not use stochastic depth [3] and other regularization strategies in MIM pre-training.

| config                 | value                        |
|------------------------|------------------------------|
| optimizer              | AdamW                        |
| base learning rate     | 1.5e-4                       |
| weight decay           | 0.05                         |
| optimizer momentum     | $\beta_1, \beta_2=0.9, 0.95$ |
| batch size             | 4096                         |
| learning rate schedule | cosine decay                 |
| warmup epochs          | 40                           |
| training epochs        | 1600                         |
| augmentation           | RandomResizedCrop            |

Table 1: MIM Pre-training settings.

#### 1.2 Details on Image22K intermediate fine-tuning.

We further intermediately fine-tune RevColV2 models on ImageNet-22K dataset. The fine-tuning details is shown in Table 2. The hyper-parameters generally follow [4, 2].

#### 1.3 End-to-end fine-tuning details on ImageNet-1K.

We end-to-end fine-tune RevCol variants on ImageNet-1K after MIM pre-training and intermediately fine-tuning on ImageNet-22K. Table 3 shows the detail training settings after MIM pre-training.

We also show training settings on ImageNet-1K after ImageNet-22K fine-tuning. Table 4 gives the detailed hyper-parameters.

| config                 | value                         |
|------------------------|-------------------------------|
| optimizer              | AdamW                         |
| base learning rate     | 2.5e-4                        |
| weight decay           | 0.05                          |
| optimizer momentum     | $\beta_1, \beta_2=0.9, 0.999$ |
| layer-wise lr decay    | 0.8                           |
| batch size             | 4096                          |
| learning rate schedule | cosine decay                  |
| warmup epochs          | 5                             |
| training epochs        | 90                            |
| augmentation           | RandAug (9, 0.5)              |
| label smoothing        | 0.1                           |
| mixup                  | 0.8                           |
| cutmix                 | 1.0                           |
| drop path              | 0.1 (B), 0.2 (L)              |
| head init              | 0.001                         |
| ema                    | None                          |

Table 2: End-to-end IN-22K intermediate fine-tuning settings.

| config                 | value                         |
|------------------------|-------------------------------|
| optimizer              | AdamW                         |
| base learning rate     | 5e-4                          |
| weight decay           | 0.05                          |
| optimizer momentum     | $\beta_1, \beta_2=0.9, 0.999$ |
| layer-wise lr decay    | 0.75                          |
| batch size             | 1024                          |
| learning rate schedule | cosine decay                  |
| warmup epochs          | 5                             |
| training epochs        | 100 (B), 50 (L)               |
| augmentation           | RandAug (9, 0.5)              |
| label smoothing        | 0.1                           |
| mixup                  | 0.8                           |
| cutmix                 | 1.0                           |
| drop path              | 0.1                           |
| head init              | 0.001                         |
| ema                    | 0.9999                        |

Table 3: End-to-end ImageNet-1K fine-tuning settings

#### 1.4 Details on ADE20K semantic segmentation

For semantic segmentation, we evaluate different backbones on ADE20K dataset. We fine-tune the pre-trained networks on ADE20K with 160,000 iterations. For UperNet framework [5], the learning rate is 4e-5 with batch size 16, using AdamW optimizer. The layer-wise learning rate decay rate is set as 0.65 for both base and large size models. The drop path rate is 0.1. For Mask2Former framework [6], the learning rate is 2e-5 with batch size 16. The drop path rate is set as 0.3 and the layer-wise learning rate decay rate is 0.9.

#### 1.5 Details on COCO object detection and instance segmentation

For object detection and instance segmentation, we evaluate RevColV2 backbones with Mask R-CNN [7] and Cascade Mask R-CNN [8] detectors. We use ImageNet-1K MIM pre-trained weights as initialization and fine-tune the models with 50 epochs and a batch size of 32, learning rate 1e-4 for Mask R-CNN framework. The large scale jittering data augmentation strategy is used with scale range [0.1, 2.0]. The drop path rates for RevColV2 are set as 0.2 (base) and 0.3 (large) and the layer-wise learning rate decay rates are set as 0.9. For Cascade Mask R-CNN framework, we train

| config                 | value                         |
|------------------------|-------------------------------|
| optimizer              | AdamW                         |
| base learning rate     | 2.5e-5                        |
| weight decay           | 0.01                          |
| optimizer momentum     | $\beta_1, \beta_2=0.9, 0.999$ |
| layer-wise lr decay    | 0.9                           |
| batch size             | 512                           |
| learning rate schedule | cosine decay                  |
| warmup epochs          | None                          |
| training epochs        | 30                            |
| augmentation           | RandAug (9, 0.5)              |
| label smoothing        | 0.1                           |
| mixup                  | None                          |
| cutmix                 | None                          |
| drop path              | 0.1(B), 0.2 (L)               |
| head init              | 0.001                         |
| ema                    | 0.9999                        |

Table 4: End-to-end ImageNet-1K fine-tuning settings (after IN-22K intermediate fine-tuning).

models with 100 epochs following [9] with large scale jittering augmentation strategy. The learning rate is 1e-4 with batch size 64. We do not use soft-NMS in our experiments.

## 2 More Results

### 2.1 Compared with supervised baseline

To verify the effectiveness of RevColV2 architecture with MIM pre-train, we compare the performance on ImageNet-1K fine-tune using MIM pre-trained model weights and random initialization. We use the same setting with [1] in this supervised baseline, except additional 0.999 EMA strategy. The base/large models achieve 83.1% and 82.6% top-1 accuracy on ImageNet-1K. The MIM pre-trained RevColV2 models outperform supervised baseline by a large margin (+1.6% and +3.7%).

### 2.2 Linear probing results

We report the linear probing results on ImageNet-1K after pre-training for RevColV2 models and other counterparts on Table 5. Following [1], we fix the pre-trained backbone models and train a classification head for 90 epochs with LARS optimizer. We append this classification head on the last level of bottom-up columns in RevColV2. The linear probing performance of RevColV2 models surpasses other encoder only models such as SimMIM [10] and autoencoder models such as MAE [1].

Table 5: Linear probing results on ImageNet-1K dataset.

| Model                         | Size             | Target | Params | FLOPs | LIN         |
|-------------------------------|------------------|--------|--------|-------|-------------|
| <i>ImageNet-1K pre-train:</i> |                  |        |        |       |             |
| BEIT-B [11]                   | 224 <sup>2</sup> | DALL-E | 87M    | 18G   | 56.7        |
| SimMIM-B [10]                 | 224 <sup>2</sup> | Pixel  | 88M    | 16G   | 56.7        |
| RevColV2-B                    | 224 <sup>2</sup> | Pixel  | 88M    | 19G   | <b>67.7</b> |
| MAE-L [1]                     | 224 <sup>2</sup> | Pixel  | 307M   | 62G   | 75.8        |
| RevColV2-L                    | 224 <sup>2</sup> | Pixel  | 327M   | 67G   | <b>79.3</b> |

## References

- [1] Kaiming He, Xinlei Chen, Saining Xie, Yanghao Li, Piotr Dollár, and Ross Girshick. Masked autoencoders are scalable vision learners. In *Proceedings of the IEEE/CVF Conference on Computer Vision and Pattern Recognition*, pages 16000–16009, 2022.
- [2] Sanghyun Woo, Shoubhik Debnath, Ronghang Hu, Xinlei Chen, Zhuang Liu, In So Kweon, and Saining Xie. Convnext v2: Co-designing and scaling convnets with masked autoencoders. *arXiv preprint arXiv:2301.00808*, 2023.
- [3] Gao Huang, Yu Sun, Zhuang Liu, Daniel Sedra, and Kilian Q Weinberger. Deep networks with stochastic depth. In *Computer Vision–ECCV 2016: 14th European Conference, Amsterdam, The Netherlands, October 11–14, 2016, Proceedings, Part IV 14*, pages 646–661. Springer, 2016.
- [4] Yuxuan Cai, Yizhuang Zhou, Qi Han, Jianjian Sun, Xiangwen Kong, Jun Li, and Xiangyu Zhang. Reversible column networks. *arXiv preprint arXiv:2212.11696*, 2022.
- [5] Tete Xiao, Yingcheng Liu, Bolei Zhou, Yuning Jiang, and Jian Sun. Unified perceptual parsing for scene understanding. In *Proceedings of the European conference on computer vision (ECCV)*, pages 418–434, 2018.
- [6] Bowen Cheng, Anwesa Choudhuri, Ishan Misra, Alexander Kirillov, Rohit Girdhar, and Alexander G Schwing. Mask2former for video instance segmentation. *arXiv preprint arXiv:2112.10764*, 2021.
- [7] Kaiming He, Georgia Gkioxari, Piotr Dollár, and Ross Girshick. Mask r-cnn. In *Proceedings of the IEEE international conference on computer vision*, pages 2961–2969, 2017.
- [8] Zhaowei Cai and Nuno Vasconcelos. Cascade r-cnn: Delving into high quality object detection. In *Proceedings of the IEEE conference on computer vision and pattern recognition*, pages 6154–6162, 2018.
- [9] Yanghao Li, Hanzi Mao, Ross Girshick, and Kaiming He. Exploring plain vision transformer backbones for object detection. In *Computer Vision–ECCV 2022: 17th European Conference, Tel Aviv, Israel, October 23–27, 2022, Proceedings, Part IX*, pages 280–296. Springer, 2022.
- [10] Zhenda Xie, Zheng Zhang, Yue Cao, Yutong Lin, Jianmin Bao, Zhuliang Yao, Qi Dai, and Han Hu. Simmim: A simple framework for masked image modeling. In *Proceedings of the IEEE/CVF Conference on Computer Vision and Pattern Recognition*, pages 9653–9663, 2022.
- [11] Hangbo Bao, Li Dong, Songhao Piao, and Furu Wei. Beit: Bert pre-training of image transformers. *arXiv preprint arXiv:2106.08254*, 2021.
